# Supplementary material
Source: MDPI journal article supplement (https://www.mdpi.com/2076-3417/13/13/7516)
Supplement: s1 [file s1 › applsci-2381004-supplementary.pdf]

Supplementary Information to:

## Glycerol Flow through a Shielded Coil Induces Aggregation and Activity Enhancement of Horseradish Peroxidase

Yuri D. Ivanov<sup>1,2\*</sup>, Ivan D. Shumov<sup>1</sup>, Andrey F. Kozlov<sup>1</sup>, Maria O. Ershova<sup>1</sup>, Anastasia A. Valueva<sup>1</sup>, Irina A. Ivanova<sup>1</sup>, Vadim Y. Tatur<sup>3</sup>, Andrei A. Lukyanitsa<sup>3,4</sup>, Nina D. Ivanova<sup>3,5</sup>, and Vadim S. Ziborov<sup>1,2</sup>

<sup>1</sup> Institute of Biomedical Chemistry, Pogodinskaya Str., 10 Build. 8, Moscow 119121, Russia; shum230988@mail.ru (I.D.S.); afkozlow@mail.ru (A.F.K.); varuevavarueva@gmail.com (A.A.V.); i.a.ivanova@bk.ru (I.A.I.); motya00121997@mail.ru (M.O.E.); ziborov.vs@yandex.ru (V.S.Z.)

<sup>2</sup> Joint Institute for High Temperatures of the Russian Academy of Sciences, Moscow 125412, Russia

<sup>3</sup> Foundation of Perspective Technologies and Novations, Moscow 115682, Russia; v\_tatur@mail.ru (V.Y.T.); ninaivan1972@gmail.com (N.D.I.); andrei\_luk@mail.ru (A.A.L.)

<sup>4</sup> Moscow State University, Faculty of Computational Mathematics and Cybernetics, 119991 Moscow, Russia;

<sup>5</sup> Moscow State Academy of Veterinary Medicine and Biotechnology Named after Skryabin, Moscow 109472, Russia.

\* Correspondence: yurii.ivanov.nata@gmail.com

Figure S1 shows the schematic drawing of the experimental setup.

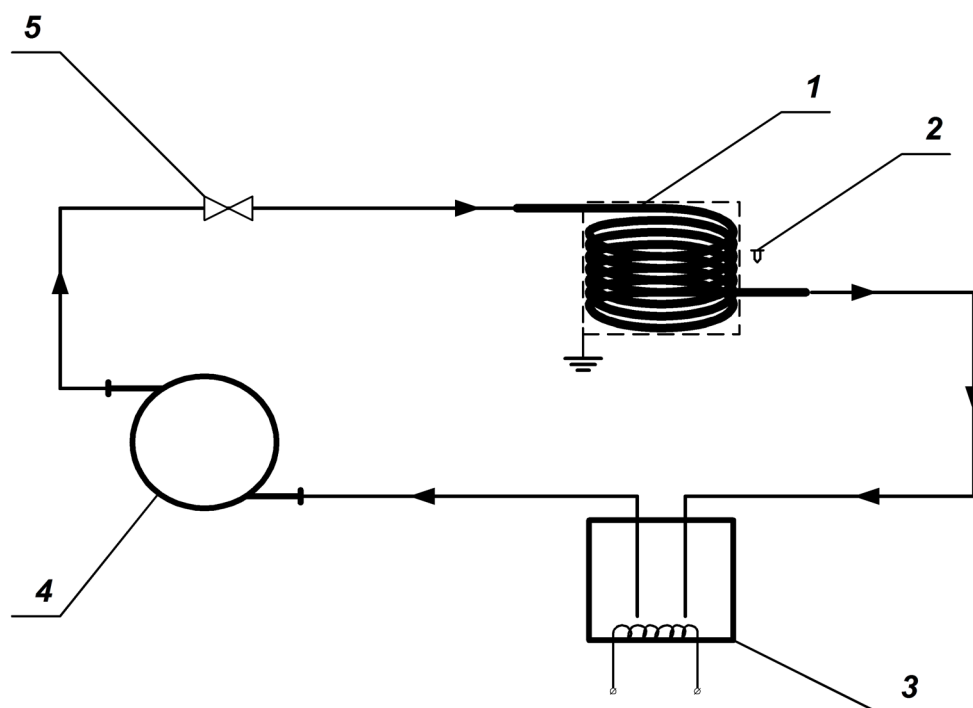

**Figure S1.** Schematic drawing of the experimental setup. Numbers indicate the main units of the setup: the silicone pipe coil, which is covered with ground-shielded aluminium foil shown with dashed box (1); the test tube with the enzyme sample placed at a 2 cm distance from the coil (2); the heater (3) the pump (4); and the flowrate regulation valve (5). The test tube with the control enzyme sample (not shown in the drawing) was placed 3 m away from the coil. All tubings are heat-insulated. The flow direction is indicated by black arrows.

Figure S2 displays photographic image of the ground-shielded pipe coil.

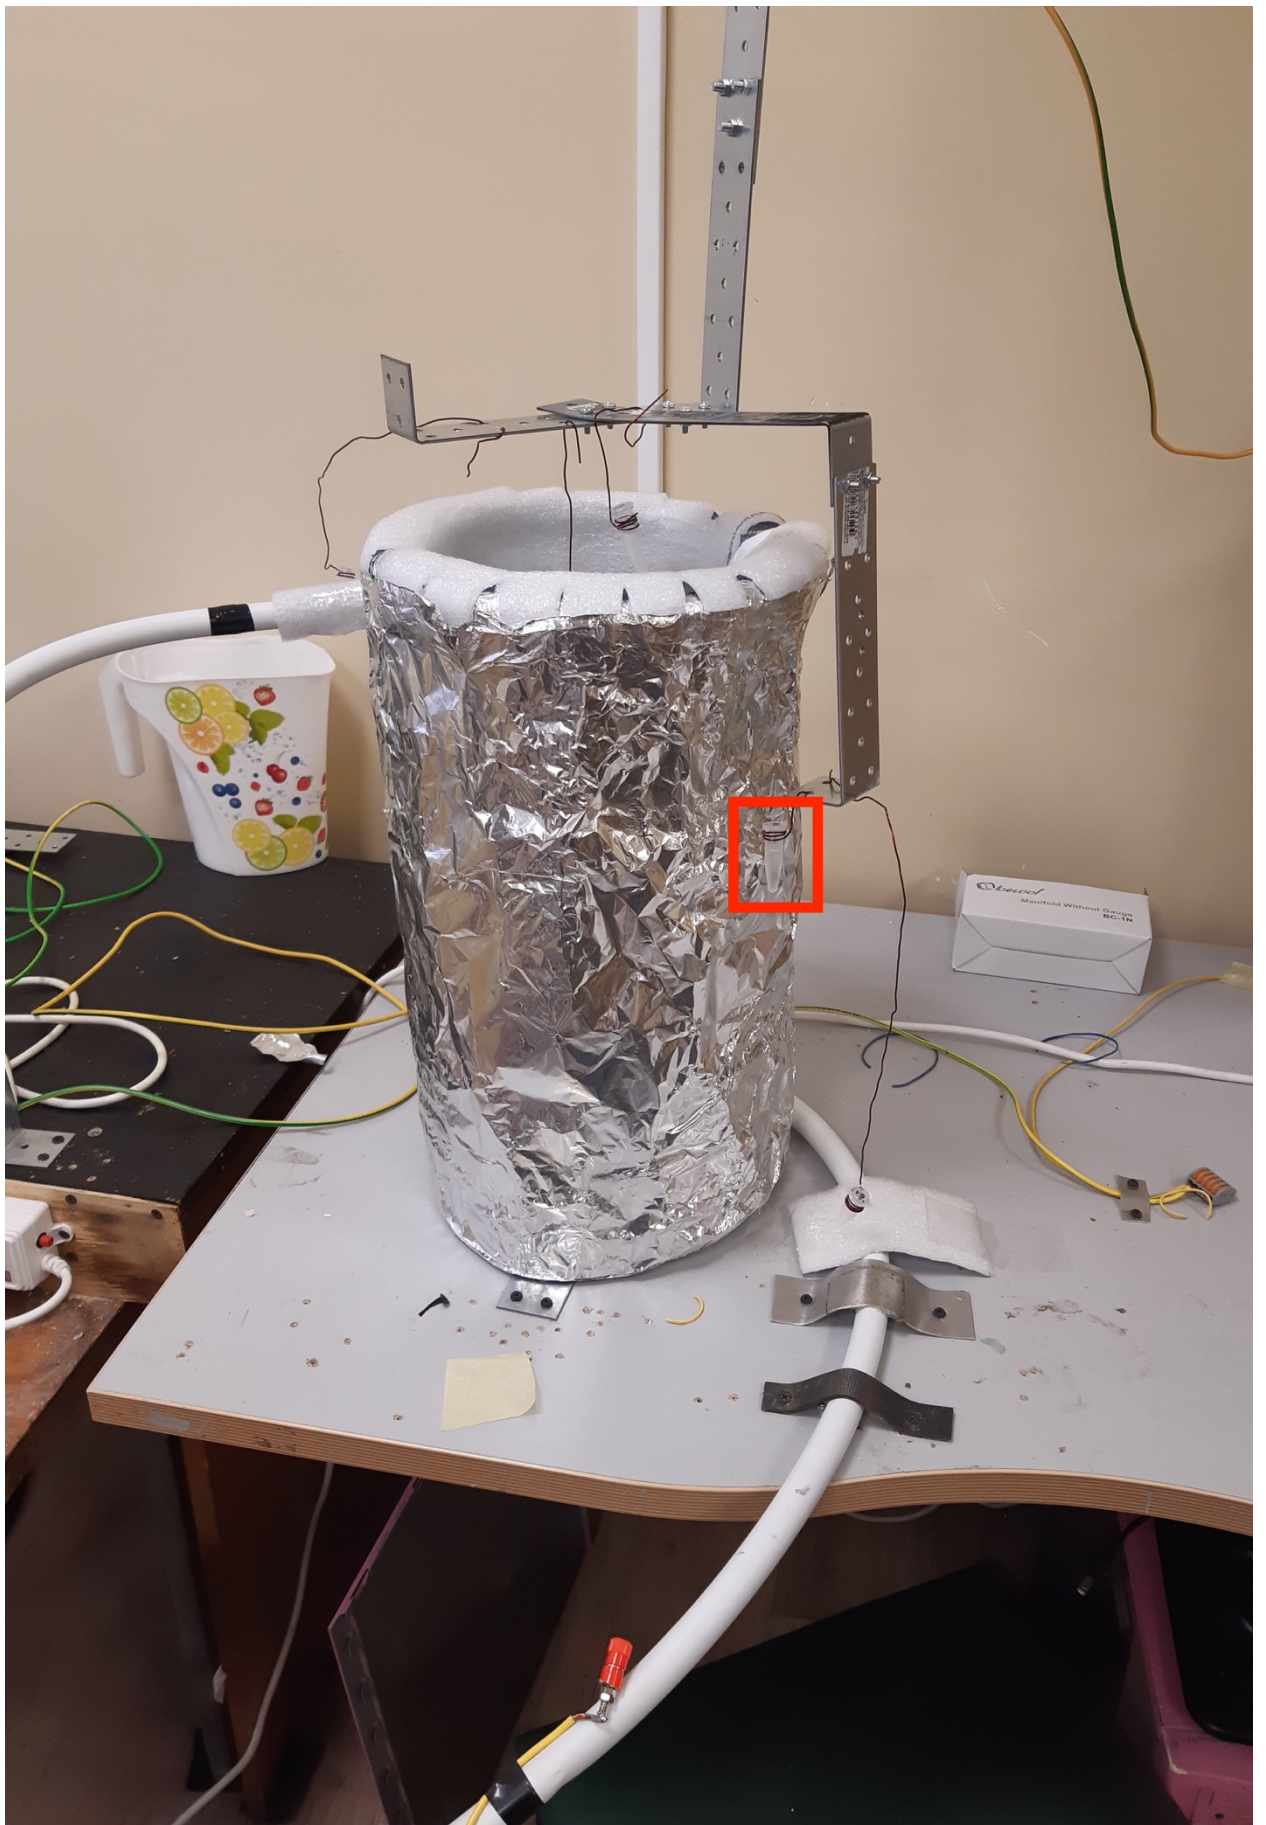

**Figure S2.** Photographic image of the shielded coil. Red box indicates the test tube with the HRP sample incubated near the side of the coil.
